# Supplementary material
Source: MDPI journal article supplement (https://www.mdpi.com/2254-9625/11/4/112)

*Supplementary Figure S1*

BMI and BMI z scores frequency of distribution within the sample.

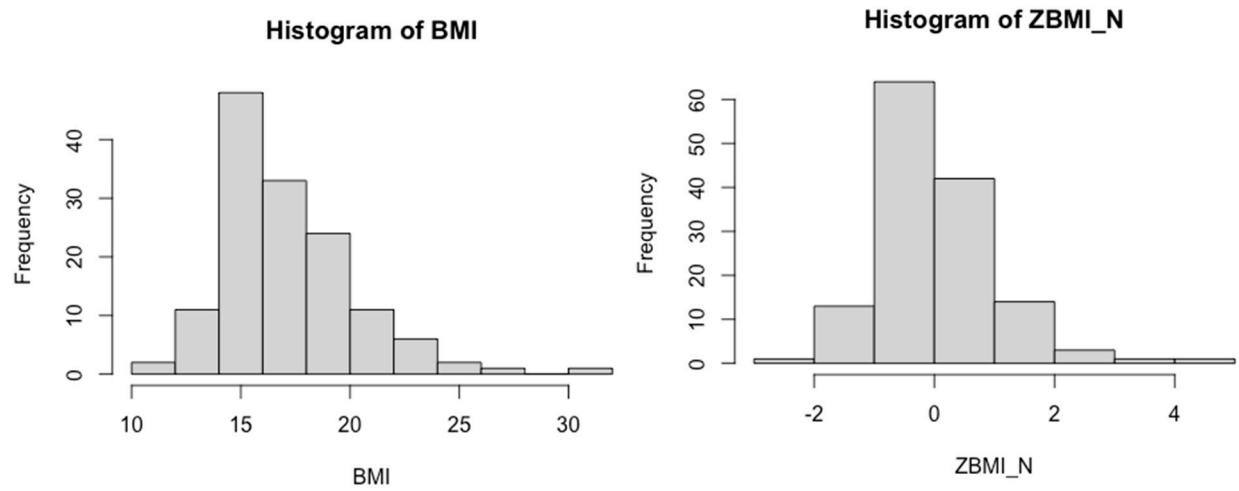

*Supplementary Figure S2*

Interaction Effect of rMSSD change and BMI on the Physical Comfort ( $N = 130$ ).

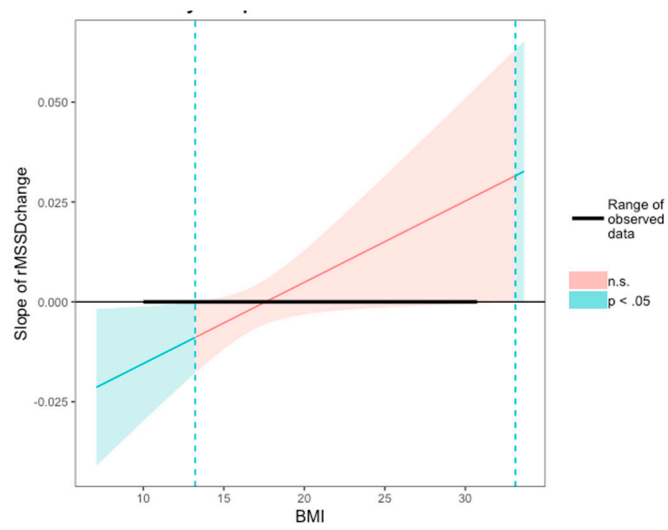

### Supplementary Figure S3

Interaction Effect of rMSSD change and BMI (Panel A) and of satisfaction with classroom climate and BMI (Panel B) on Emotional Comfort ( $N = 130$ ).

#### Panel A

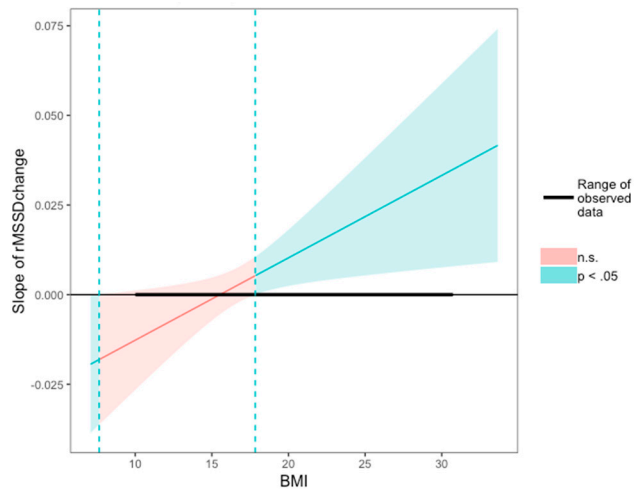

#### Panel B

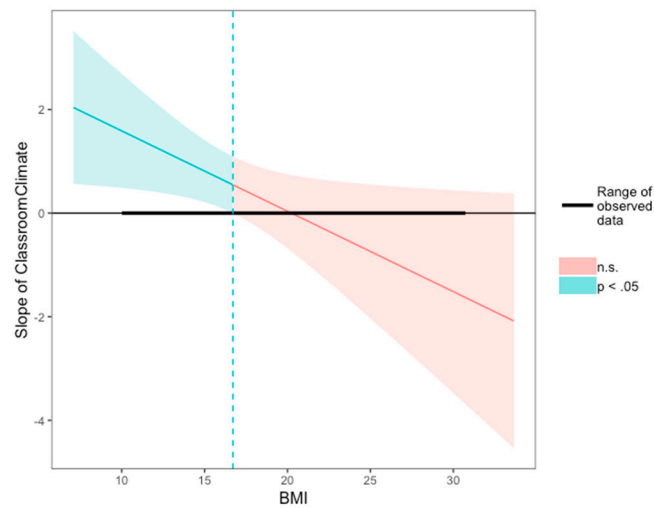

Supplement: s1 [file s1]
